# Supplementary material
Source: Research Square preprint supplement (doi:10.21203/rs.3.rs-10101223/v1)
Supplement: Supplementary file 1 [file f39feb093994b44311c403e6.docx]

Neuroimaging Biomarkers in Motoric Cognitive Risk Syndrome: A Systematic Review of Structural, Functional, and Molecular Correlates

## Appendix 1: Full Search Strings

### PubMed

("magnetic resonance imaging"[MeSH Terms] OR "MRI"[All Fields] OR
"functional magnetic resonance imaging"[MeSH Terms] OR "fMRI"[All Fields] OR
"diffusion tensor imaging"[MeSH Terms] OR "DTI"[All Fields] OR
"brain imaging"[All Fields] OR "neuroimaging"[All Fields] OR "neuro imaging"[All Fields] OR
"single photon emission computed tomography"[MeSH Terms] OR "SPECT"[All Fields] OR
"positron emission tomography"[MeSH Terms] OR "PET"[All Fields] OR
"magnetoencephalography"[MeSH Terms] OR "MEG"[All Fields] OR
"electroencephalography"[MeSH Terms] OR "EEG"[All Fields] OR
"functional near-infrared spectroscopy"[MeSH Terms] OR "fNIRS"[All Fields] OR
"cerebral microbleeds"[MeSH Terms] OR "white matter hyperintensities"[All Fields] OR
"gray matter"[All Fields] OR "hippocampal volume"[All Fields] OR
"cortical thickness"[All Fields] OR "brain atrophy"[All Fields])
AND
("motoric cognitive risk syndrome"[All Fields] OR "MCR syndrome"[All Fields] OR
"motoric cognitive risk"[All Fields] OR "motoric cognitive syndrome"[All Fields])

**Original search:** March 2025 (n = 406); **Update:** June 2026 (n = 35)

### Embase

('magnetic resonance imaging'/exp OR 'MRI' OR
'functional magnetic resonance imaging'/exp OR 'fMRI' OR
'diffusion tensor imaging'/exp OR 'DTI' OR
'brain imaging' OR 'neuroimaging' OR 'neuro imaging' OR
'single photon emission computed tomography'/exp OR "SPECT" OR
'positron emission tomography'/exp OR 'PET' OR
'magnetoencephalography'/exp OR 'MEG' OR
'electroencephalography'/exp OR 'EEG' OR
'functional near-infrared spectroscopy'/exp OR 'fNIRS'/exp OR
'cerebral microbleeds'/exp OR 'white matter hyperintensities' OR
'gray matter' OR 'hippocampal volume' OR
'cortical thickness' OR 'brain atrophy')
AND
('motoric cognitive risk syndrome' OR 'MCR syndrome' OR
'motoric cognitive risk' OR 'motoric cognitive syndrome')

**Original search:** March 2025 (n = 377); **Update:** June 2026 (n = 12)

### CINAHL

(magnetic resonance imaging OR MRI OR
functional magnetic resonance imaging OR fMRI OR
diffusion tensor imaging OR DTI OR
brain imaging OR neuroimaging OR neuro imaging OR
single photon emission computed tomography OR SPECT OR
positron emission tomography OR PET OR
magnetoencephalography OR MEG OR
electroencephalography OR EEG OR
functional near-infrared spectroscopy OR fNIRS OR
cerebral microbleeds OR white matter hyperintensities OR
gray matter OR hippocampal volume OR
cortical thickness OR brain atrophy)
AND
(motoric cognitive risk syndrome OR MCR syndrome OR
motoric cognitive risk OR motoric cognitive syndrome)

**Original search:** March 2025 (n = 10); **Update:** June 2026 (n = 2)

### Web of Science

(ALL=(magnetic resonance imaging OR MRI OR functional magnetic resonance imaging
OR fMRI OR diffusion tensor imaging OR DTI OR brain imaging OR neuroimaging OR
neuro imaging OR single photon emission computed tomography OR SPECT OR
positron emission tomography OR PET OR magnetoencephalography OR MEG OR
electroencephalography OR EEG OR functional near-infrared spectroscopy OR fNIRS OR
cerebral microbleeds OR white matter hyperintensities OR gray matter OR hippocampal
volume OR cortical thickness OR brain atrophy)) AND ALL=(motoric cognitive risk
syndrome OR MCR syndrome OR motoric cognitive risk OR motoric cognitive syndrome)

**Original search:** March 2025 (n = 65); **Update:** June 2026 (n = 1)

##

## Appendix 2: PRISMA 2020 Checklist

**PRISMA 2020 Checklist**

| Section and Topic | Item # | Checklist Item | Location |
| --- | --- | --- | --- |
| **TITLE** |  |  |  |
| Title | 1 | Identify the report as a systematic review. | Title page |
| **ABSTRACT** |  |  |  |
| Abstract | 2 | See PRISMA 2020 for Abstracts checklist. | Abstract section |
| **INTRODUCTION** |  |  |  |
| Rationale | 3 | Describe the rationale for the review in the context of existing knowledge. | Section 1, paragraphs 1-4 |
| Objectives | 4 | Provide an explicit statement of the objective(s) or question(s) the review addresses. | Section 1, paragraph 5 |
| **METHODS** |  |  |  |
| Eligibility criteria | 5 | Specify the inclusion and exclusion criteria. | Section 2.3 |
| Information sources | 6 | Specify all databases searched and search dates. | Section 2.2 |
| Search strategy | 7 | Present full search strategies. | Section 2.2; Appendix 1 |
| Selection process | 8 | Specify methods used to decide whether a study met criteria. | Section 2.4 |
| Data collection process | 9 | Specify methods used to collect data from reports. | Section 2.4 |
| Data items | 10a | List and define all outcomes for which data were sought. | Section 2.4; Table 1 |
| Data items | 10b | List and define all other variables. | Section 2.4 |
| Study risk of bias assessment | 11 | Specify methods used to assess risk of bias. | Section 2.5 |
| Effect measures | 12 | Specify effect measure(s) used. | N/A — narrative synthesis |
| Synthesis methods | 13a-e | Describe processes for each synthesis. | Section 2.6 |
| Reporting bias assessment | 14 | Describe methods to assess risk of bias due to missing results. | N/A — <10 studies per modality |
| Certainty assessment | 15 | Describe methods to assess certainty in the evidence. | N/A — narrative synthesis |
| **RESULTS** |  |  |  |
| Study selection | 16a | Describe results of the search and selection process. | Section 3.1; Figure 1 |
| Study selection | 16b | Cite studies that were excluded and explain why. | Section 3.1; Appendix 2 |
| Study characteristics | 17 | Cite each included study and present its characteristics. | Section 3.2; Table 1 |
| Risk of bias in studies | 18 | Present assessments of risk of bias. | Section 3.3; Figure 2 |
| Results of individual studies | 19 | Present summary statistics for all outcomes. | Sections 3.4-3.9 |
| Results of syntheses | 20a-d | Summarise characteristics and risk of bias; present results. | Sections 3.4-3.9; Table 2 |
| Reporting biases | 21 | Present assessments of risk of bias due to missing results. | N/A |
| Certainty of evidence | 22 | Present assessments of certainty in the evidence. | Section 3.3; Figure 2 |
| **DISCUSSION** |  |  |  |
| Discussion | 23a | General interpretation of results in the context of other evidence. | Section 4.1-4.4 |
| Discussion | 23b | Limitations of the evidence included. | Section 4.6 |
| Discussion | 23c | Limitations of the review processes. | Section 4.6 |
| Discussion | 23d | Implications for practice, policy, and future research. | Section 4.7-4.8 |
| **OTHER INFORMATION** |  |  |  |
| Registration and protocol | 24a-c | Provide registration information and describe amendments. | Section 2.1 |
| Support | 25 | Describe sources of financial or non-financial support. | None |
| Competing interests | 26 | Declare any competing interests. | None |
| Availability of data | 27 | Report which materials are publicly available. | Available upon reasonable request |
